# Supplementary material for: Fabrication and Adsorption Behavior of Magnesium Silicate Hydrate Nanoparticles towards Methylene Blue
Source: MDPI journal article supplement (doi:10.3390/nano8050271), 2018-04-24
Supplement: s1 [file s1]

Supporting information

# Fabrication and Adsorption Behavior of Magnesium Silicate Hydrate Nanoparticles towards Methylene Blue

Ren Yao Huang<sup>1</sup>, Li He<sup>1</sup>, Tao Zhang<sup>2</sup>, Dianqing Li<sup>1</sup>, Pinggui Tang<sup>1</sup>, Yingying Zhao<sup>1,\*</sup> and  
Yongjun Feng<sup>1,\*</sup>

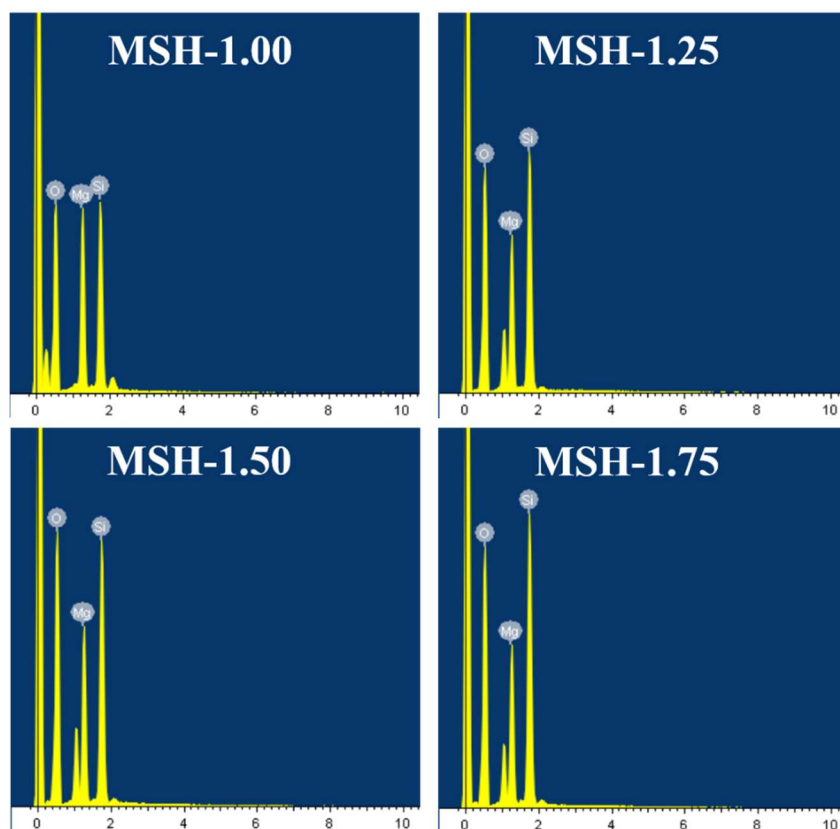

Figure S1. EDX of four magnesium silicate hydrate samples from MSH-1.00 to -1.75.

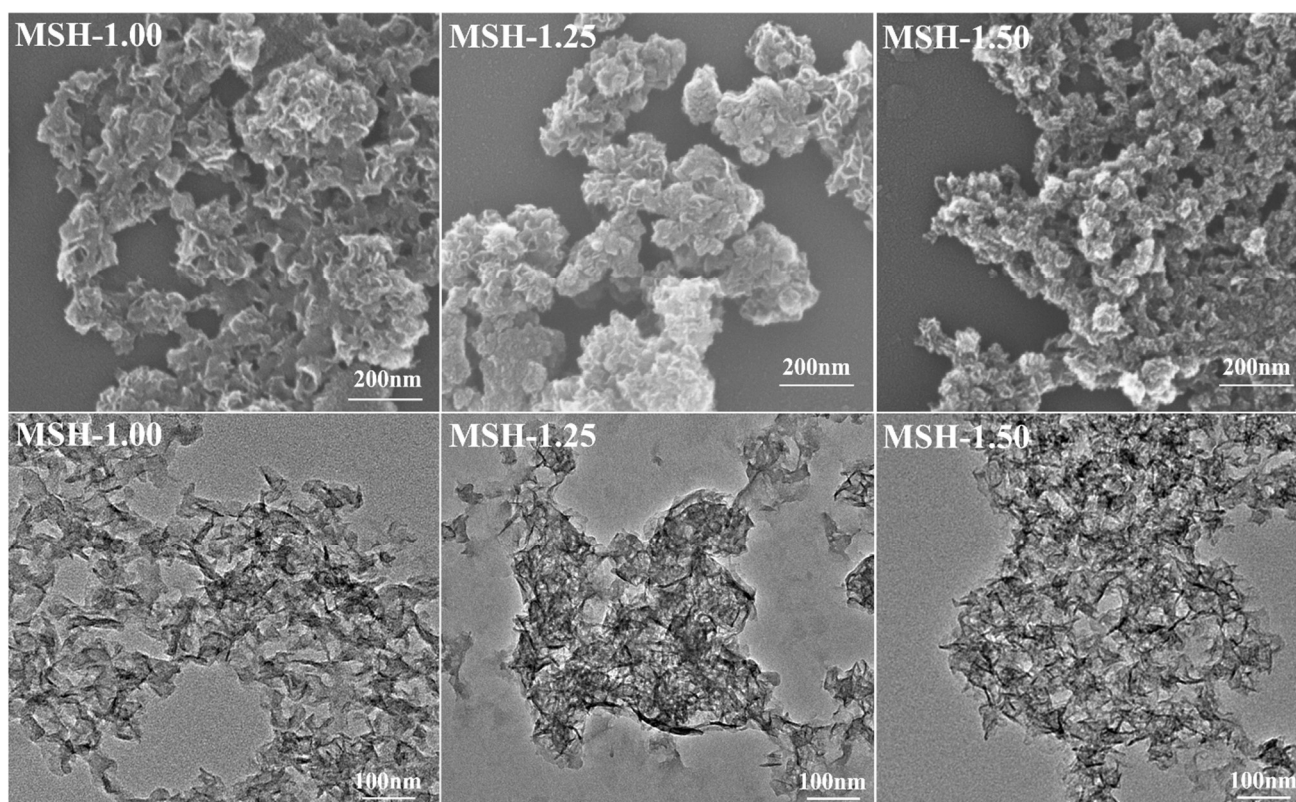

**Figure S2.** SEM images of three MSH samples with different Si/Mg ratios from 1.00 to 1.50.

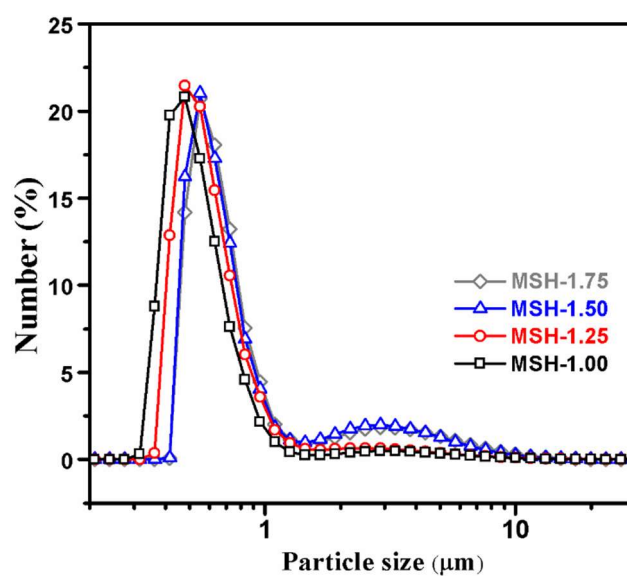

**Figure S3.** Particle size distribution of four magnesium silicate hydrate samples from MSH-1.00 to MSH-1.75.

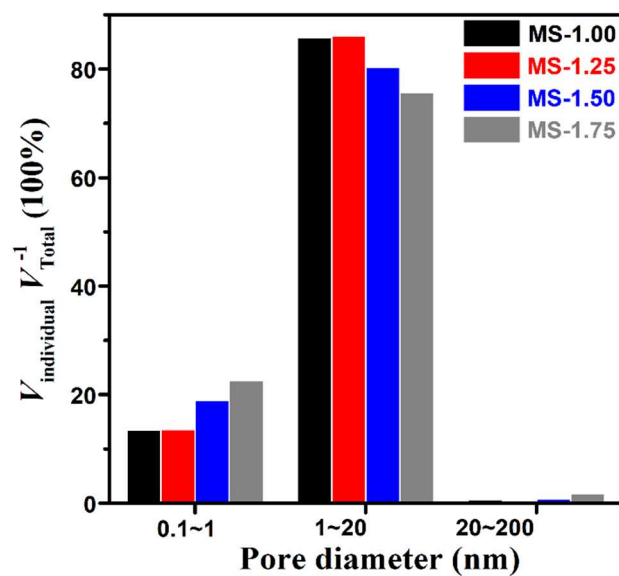

**Figure S4.** The ratio of pore volume in a certain range of pore size over total pore volume as a function of pore diameter.

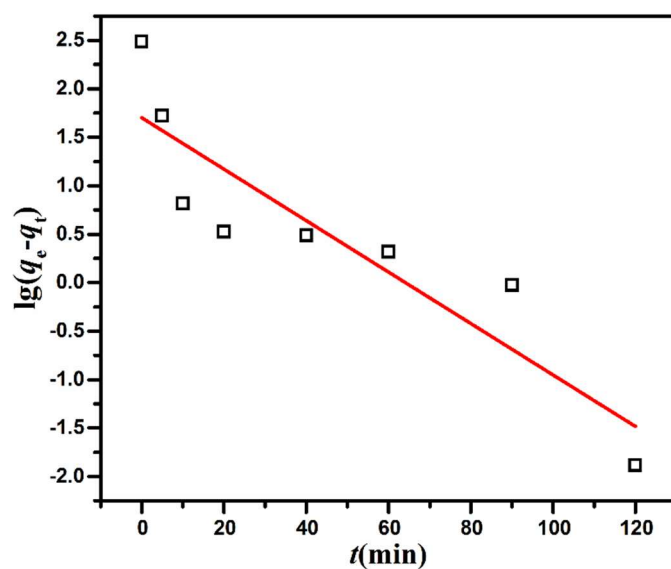

**Figure S5.** The liner fitting of pseudo-first-order kinetics of MSH-1.75 for MB adsorption.

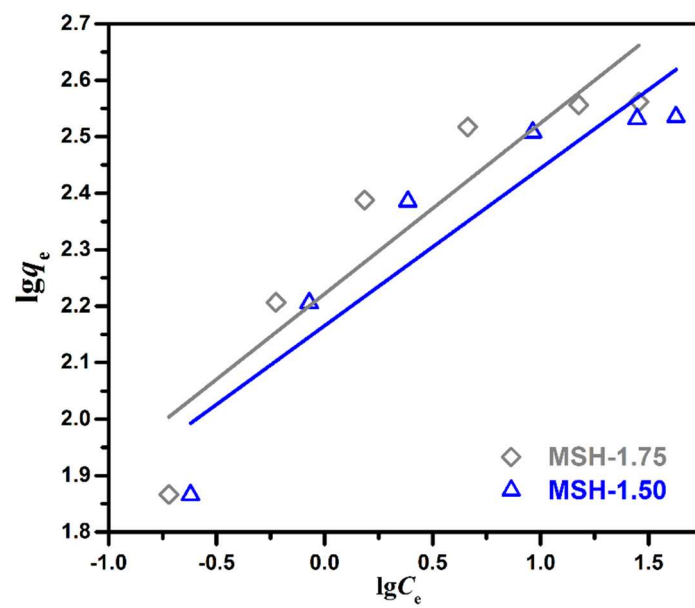

**Figure S6.** The liner fitting of Freundlich isotherm for MB adsorption by MSH-1.50 and MSH-1.75.
